# Supplementary material
Source: Elsevier journal article supplement (https://www.sciencedirect.com/science/article/pii/S1699258X22001267)
Supplement: mmc1 [file S1699258X22001267:mmc1.doc]

**Supplementary Material**

- To register with the application, it is necessary to have an email account and select the country of residence and the name of the hospital where the user works.

- The password will be chosen by the user.

- As the data is entered, the system will calculate the value of the accumulated dose as prednisone equivalent in mg.

- It is possible to include information from several patients simultaneously. In this case, the application will assign a random number to each patient. This number should be kept by the user in a codebook.

- Data will be available to the user each time he/she logs in.

- The information about the country and the hospital from which it is accessed will be used to know how this tool is used.

- The developers will not have access to patient information.
